# Supplementary material for: Theoretical studies on the effect of a bithiophene bridge with different substituent groups (R = H, CH3, OCH3 and CN) in donor–π–acceptor copolymers for organic solar cell applications
Source: Royal Society of Chemistry journal article supplement (doi:10.1039/c4cp04103h), 2014-11-26
Supplement: c4cp04103h1.pdf [file c4cp04103h1.pdf]

**Theoretical Studies on the Effect of a Bithiophene-bridge with  
Different Substituent Groups (R = H, CH<sub>3</sub>, OCH<sub>3</sub> and CN) for  
Donor- $\pi$ -Acceptor Copolymers in Organic Solar Cell  
Applications**

**Zhiyong Fu, Wei Shen, Rongxing He, Xiaorui Liu, Huili Sun, Wanqiang Yin and  
Ming Li\***

College of Chemistry and Chemical Engineering, Southwest University, Chongqing  
400715, China

---

\* To whom correspondence should be addressed. E-mail: liming@swu.edu.cn

**Table S1.** The HOMO energy levels (eV) obtained in the gas phase with PBE0, B3LYP, B1B95 and BHandHLYP methods at 6-31G\*\* basis set.

| Oligomer | PBE0  | B3LYP | B1B95 | BHandHLYP | Exp. (HOMO) |
|----------|-------|-------|-------|-----------|-------------|
| M1       | -5.07 | -4.81 | -5.00 | -5.80     | -5.04       |
| D1       | -4.89 | -4.65 | -4.86 | -5.68     |             |

**Table S2.** Calculated electronic transitions, excitation energy, oscillator strength and main configurations of all the  $\pi$ -bridges by TD-B1B95/6-311G\*\*//B1B95/6-311G\*\* approach.

|            | Excitation energy<br>(eV and nm) |     | $f$   | Transition            | Main<br>configuration   |
|------------|----------------------------------|-----|-------|-----------------------|-------------------------|
| $\pi_1$    | 4.30                             | 288 | 0.367 | $S_0 \rightarrow S_1$ | H $\rightarrow$ L (98%) |
| $\pi_2$    | 4.28                             | 290 | 0.393 | $S_0 \rightarrow S_1$ | H $\rightarrow$ L (98%) |
| $\pi_3$    | 3.72                             | 333 | 0.383 | $S_0 \rightarrow S_1$ | H $\rightarrow$ L (99%) |
| $\pi_4$    | 4.06                             | 306 | 0.337 | $S_0 \rightarrow S_1$ | H $\rightarrow$ L (98%) |
| $\pi_5$    | 3.92                             | 316 | 0.340 | $S_0 \rightarrow S_1$ | H $\rightarrow$ L (98%) |
| $\pi_6$    | 3.63                             | 341 | 0.267 | $S_0 \rightarrow S_1$ | H $\rightarrow$ L (98%) |
| $\pi_{6'}$ | 4.00                             | 310 | 0.400 | $S_0 \rightarrow S_1$ | H $\rightarrow$ L (99%) |

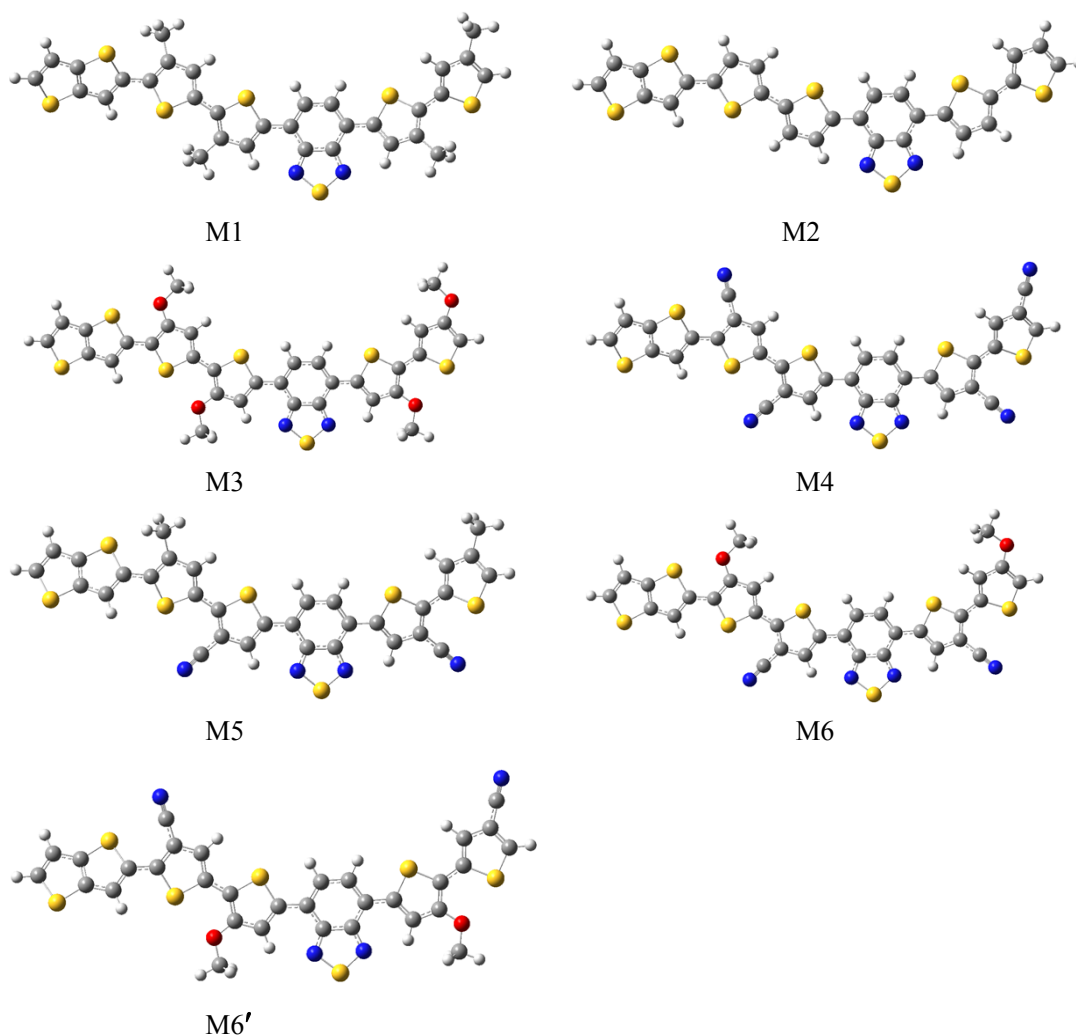

**Fig. S1** The optimized geometries of all investigated monomers calculated at B1B95/6-311G\*\*level. Color code: yellow (S), blue (N), black (C), red (O) and grey (H). In molecular structures, the alkyl (alkoxy) group has been replaced with methyl (methoxyl)

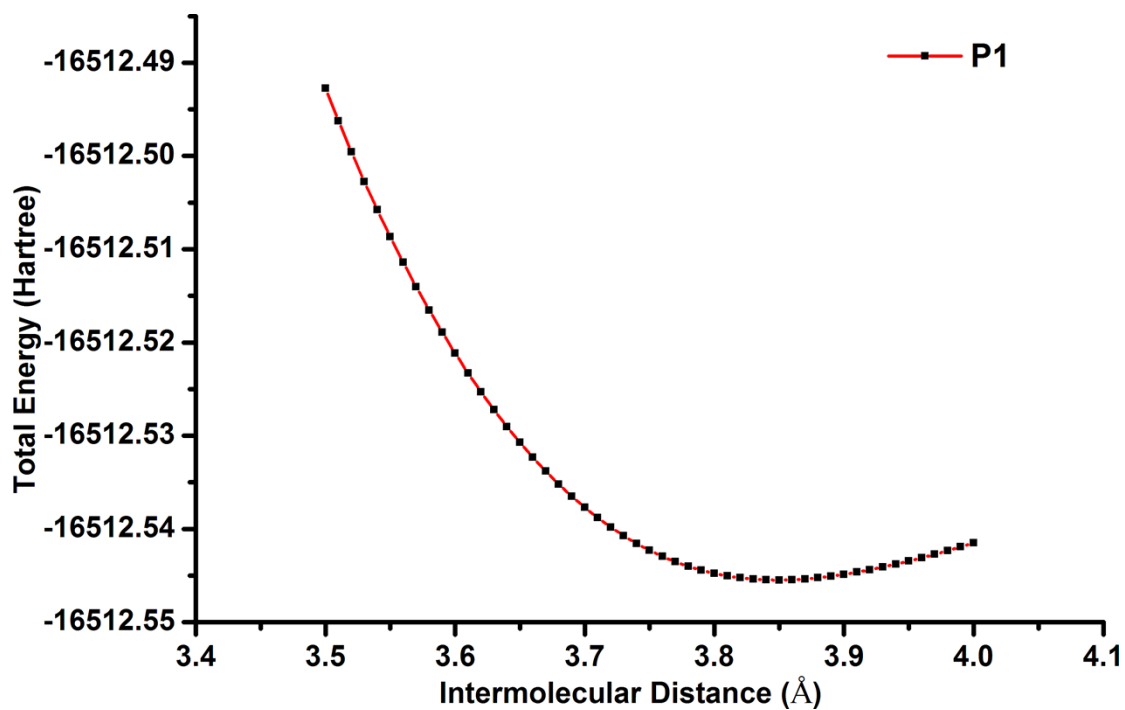

(a)

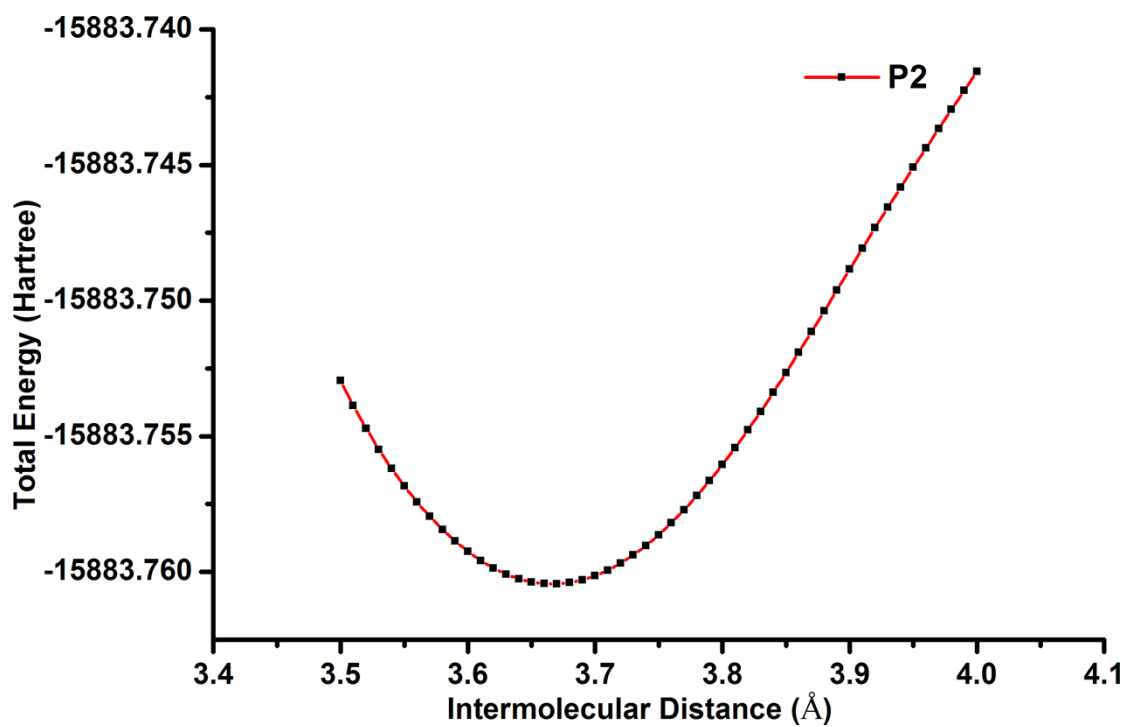

(b)

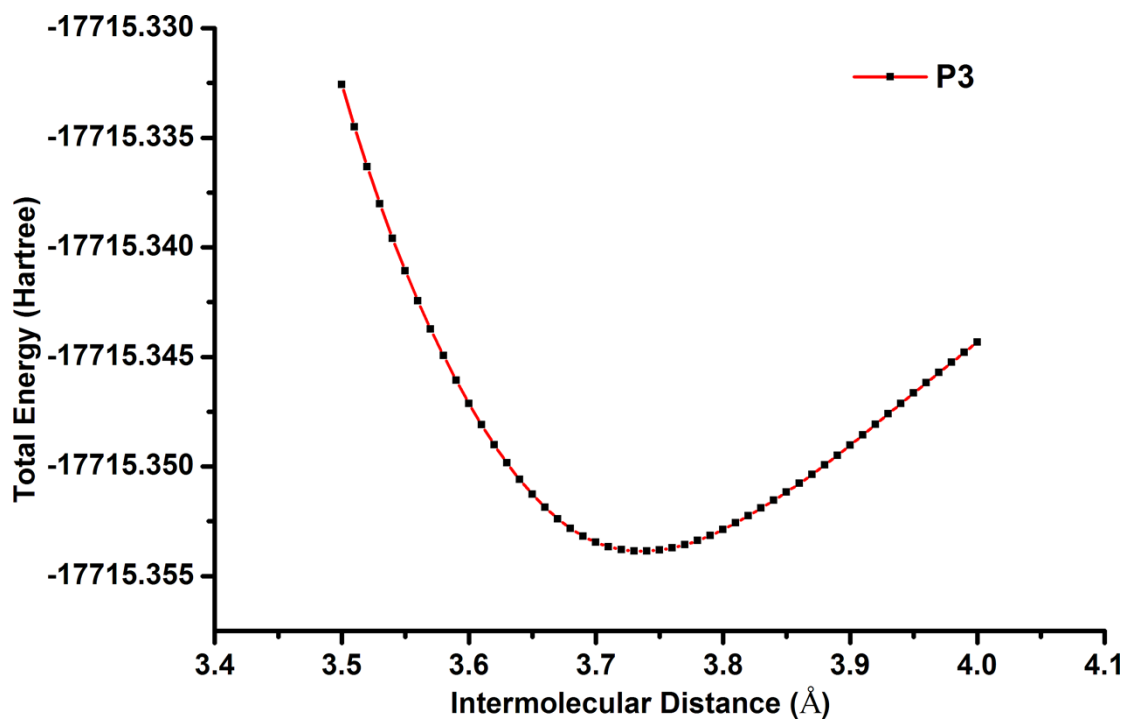

(c)

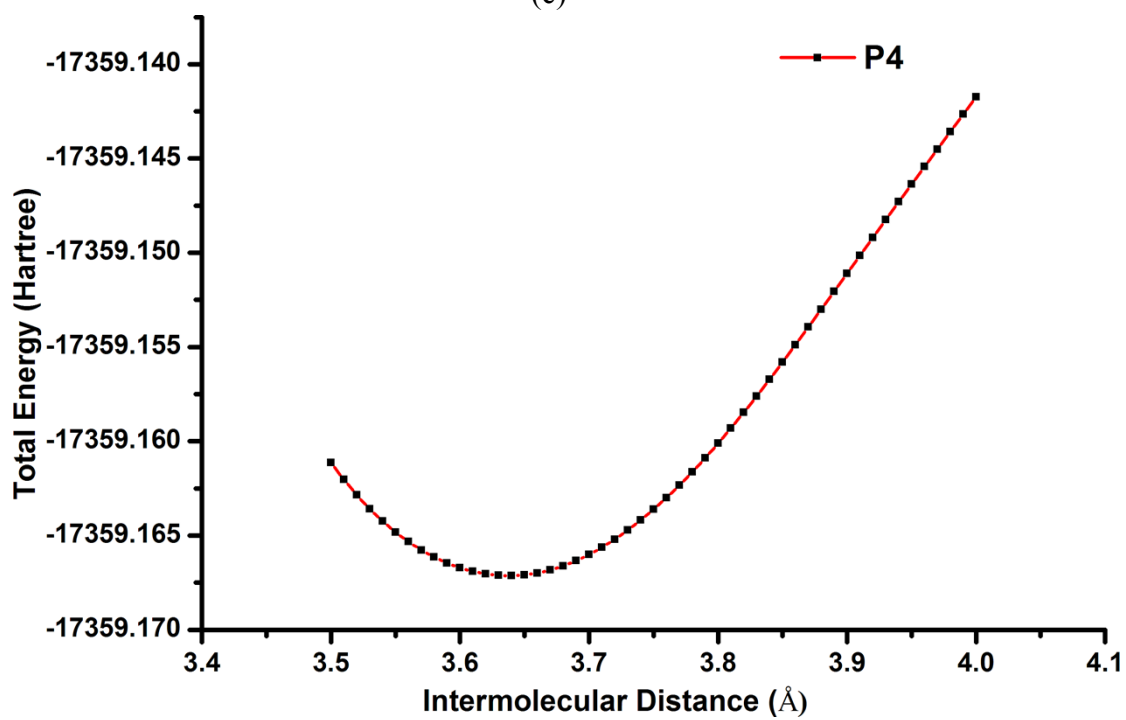

(d)

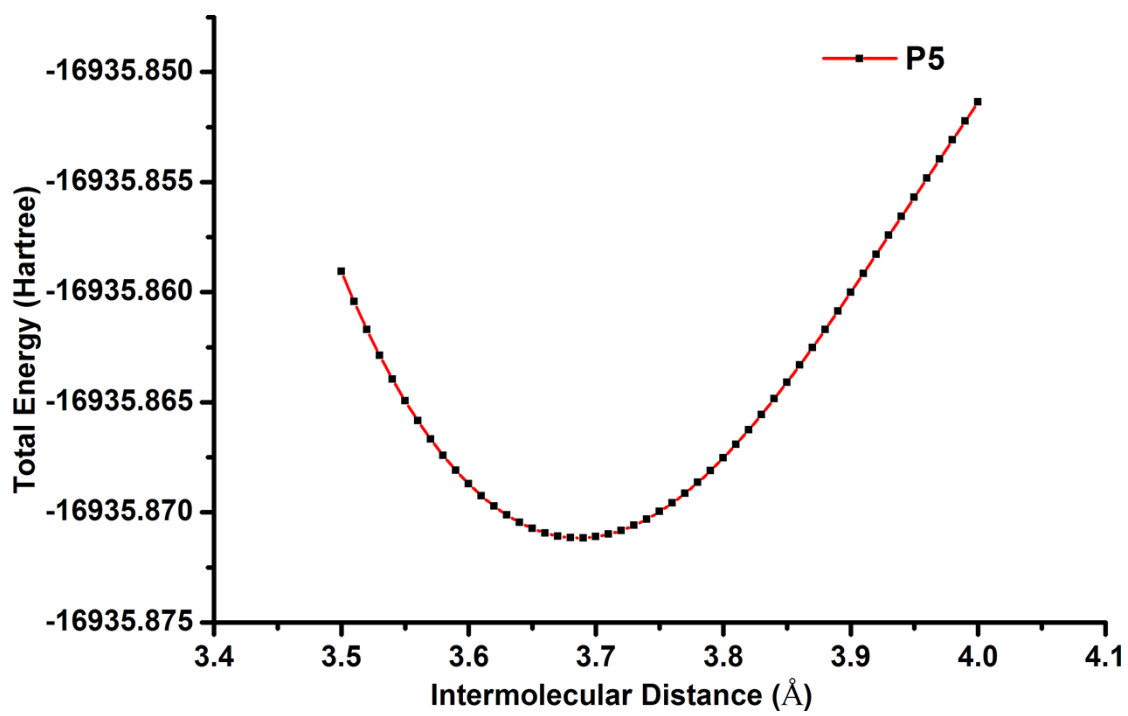

(e)

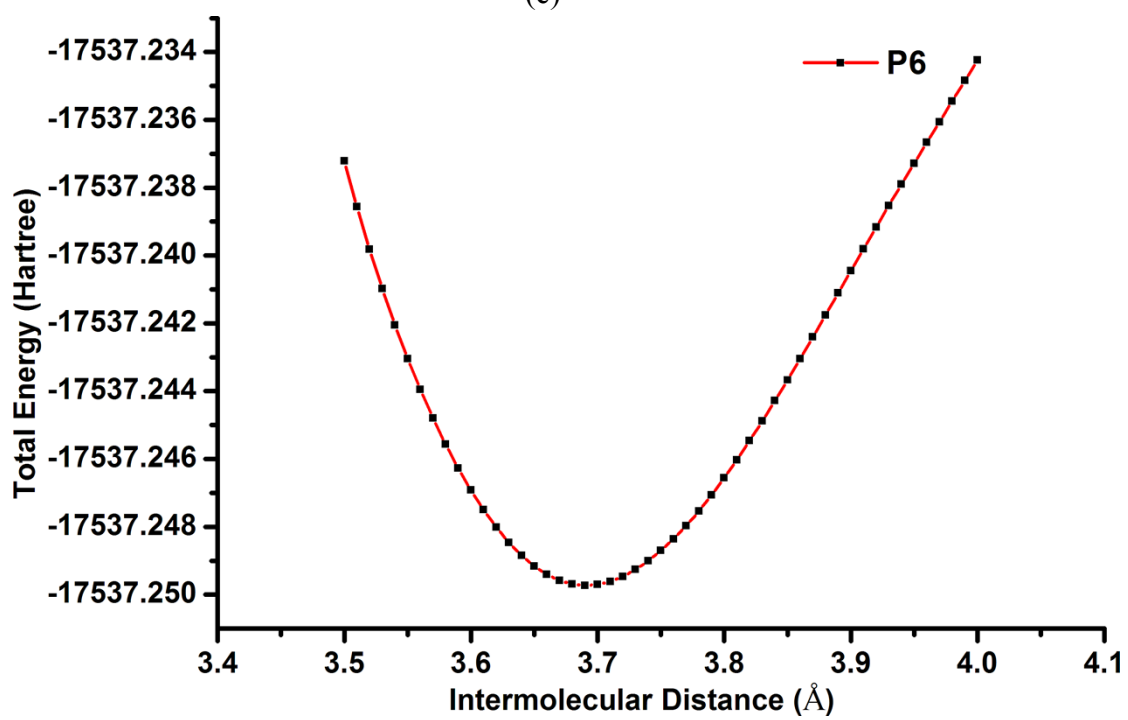

(f)

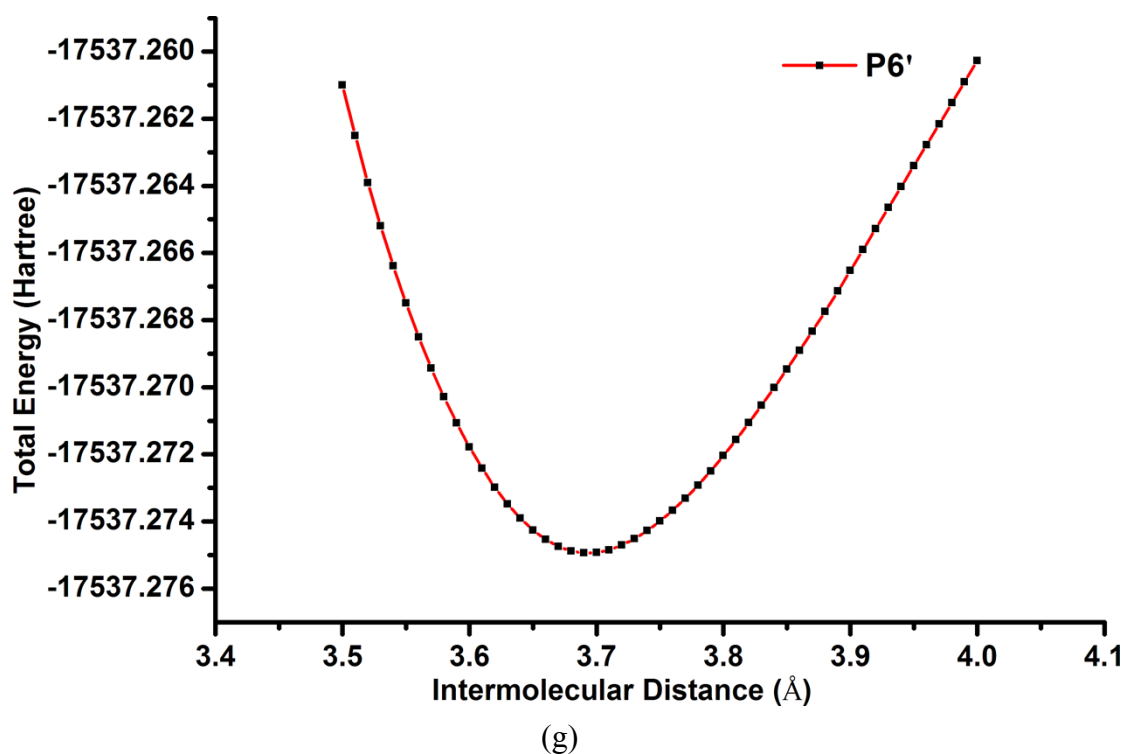

(g)

**Fig. S2** The calculated total energies of two adjacent dimmers (P1 (a), P2 (b), P3 (c), P4 (d), P5 (e), P6 (f) and P6' (g)) as the function of intermolecular distance (scanning step length is 0.01 Å)



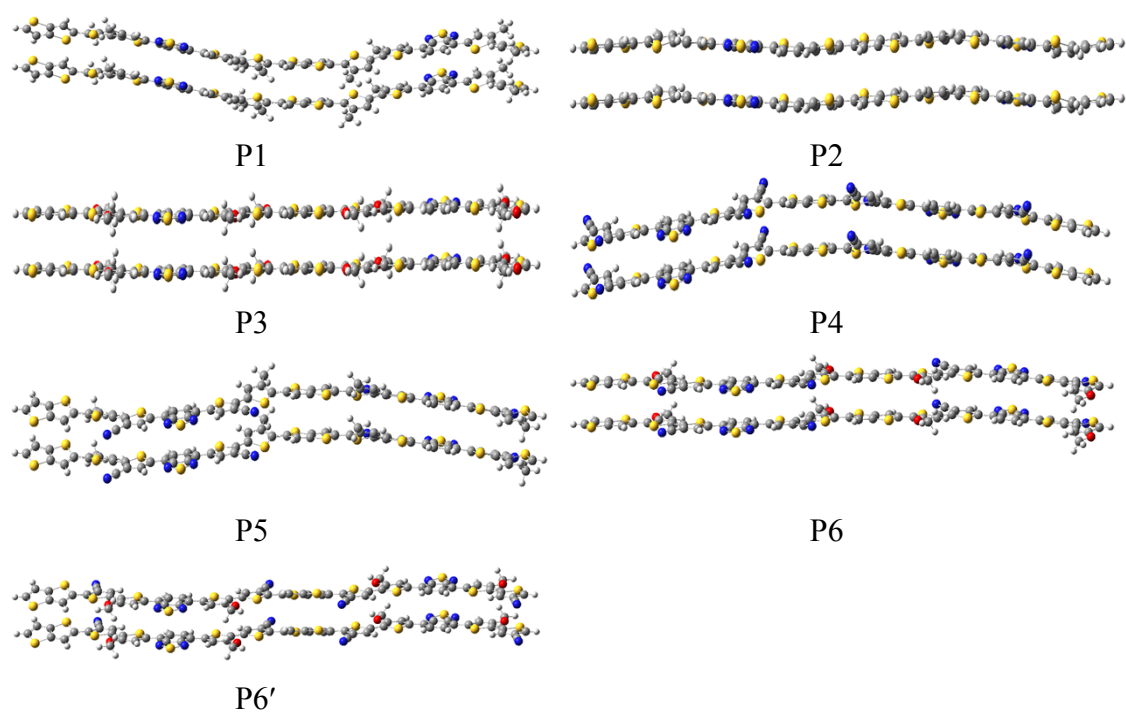

**Fig. S3** 3D models of two adjacent dimer fragments of those copolymers
